# Supplementary material for: Magnetic Solid-Phase Extraction Based on Magnetic Sulfonated Reduced Graphene Oxide for HPLC–MS/MS Analysis of Illegal Basic Dyes in Foods
Source: MDPI journal article supplement (doi:10.3390/molecules26247427), 2021-12-07
Supplement: s1 [file s1]

## Supplementary Material

**Table S1.** Properties of illegal dyes used in the study: NO. of dyes, Dye Name, CAS, Formula, RT (min), MW (g/mol) and Structure.

| No. | Dye Name        | CAS        | Formula                                                         | RT (min) | MW (g/mol) | Molecular Structure                                                                   |
|-----|-----------------|------------|-----------------------------------------------------------------|----------|------------|---------------------------------------------------------------------------------------|
| 1   | Basic Orange 21 | 3056-93-7  | C <sub>22</sub> H <sub>23</sub> ClN <sub>2</sub>                | 6.48     | 350.88     | 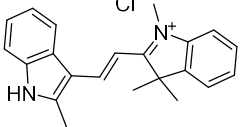   |
| 2   | Basic red 46    | 12221-69-1 | C <sub>18</sub> H <sub>21</sub> N <sub>6</sub> ·Br              | 3.37     | 403.319    |    |
| 3   | Basic Violet 1  | 8004-87-3  | C <sub>24</sub> H <sub>28</sub> ClN <sub>3</sub>                | 7.26     | 393.95     |    |
| 4   | Crystal Violet  | 548-62-9   | C <sub>25</sub> H <sub>30</sub> ClN <sub>3</sub>                | 7.53     | 407.99     |   |
| 5   | Basic Green 1   | 633-03-4   | C <sub>27</sub> H <sub>34</sub> N <sub>2</sub> O <sub>4</sub> S | 7.93     | 482.63     |  |
| 6   | Basic Orange 22 | 4657-00-5  | C <sub>28</sub> H <sub>27</sub> ClN <sub>2</sub>                | 7.37     | 426.98     |  |
| 7   | Basic Blue 11   | 2185-86-6  | C <sub>29</sub> H <sub>32</sub> N <sub>3</sub> Cl               | 7.72     | 458.05     |  |
| 8   | Rhodamine 6G    | 989-38-8   | C <sub>28</sub> H <sub>31</sub> ClN <sub>2</sub> O <sub>3</sub> | 7.43     | 479.01     |  |

| No. | Dye Name        | CAS        | Formula                                                         | RT (min) | MW<br>(g/mol) | Molecular Structure                                                                   |
|-----|-----------------|------------|-----------------------------------------------------------------|----------|---------------|---------------------------------------------------------------------------------------|
| 9   | Rhodamine B     | 81-88-9    | C <sub>28</sub> H <sub>31</sub> ClN <sub>2</sub> O <sub>3</sub> | 6.95     | 479.01        | 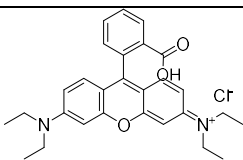   |
| 10  | Ethyl Violet 4  | 2390-59-2  | C <sub>31</sub> H <sub>42</sub> ClN <sub>3</sub>                | 9.27     | 492.14        |    |
| 11  | Basic Blue 7    | 2390-60-5  | C <sub>33</sub> H <sub>40</sub> N <sub>3</sub> Cl               | 8.76     | 514.15        |    |
| 12  | Basic red 14    | 12217-48-0 | C <sub>23</sub> H <sub>26</sub> N <sub>3</sub> Cl               | 3.44     | 379.926       |    |
| 13  | Basic red 13    | 3648-36-0  | C <sub>22</sub> H <sub>26</sub> N <sub>2</sub> Cl <sub>2</sub>  | 4.95     | 389.4         |    |
| 14  | Basic Violet 7  | 6441-82-3  | C <sub>24</sub> H <sub>30</sub> Cl <sub>2</sub> N <sub>2</sub>  | 7.38     | 417.41        |   |
| 15  | Basic Blue 26   | 2580-56-5  | C <sub>33</sub> H <sub>32</sub> N <sub>3</sub> Cl               | 7.87     | 506.09        |  |
| 16  | Malachite green | 13425-25-7 | C <sub>23</sub> H <sub>25</sub> N <sub>2</sub> Cl               | 5.17     | ----          |  |

**Table S2.** Mass spectrometry detection method of 16 basic dyes.

| Dyes                   | Retention time/min | Parent(m/z) | Daughter(m/z) |        | Cone(V) | Collision(V) |    |
|------------------------|--------------------|-------------|---------------|--------|---------|--------------|----|
| <b>Basic Orange 21</b> | <b>3.67±0.24</b>   | 315.0       | 285.0         | 300.0* | 10      | 24           | 30 |
| Basic Red 46           | 3.37±0.23          | 321.4       | 90.9          | 196.3* | 15      | 30           | 15 |
| Basic Violet 1         | 5.90±0.195         | 358.8       | 327.3         | 343.3* | 15      | 50           | 35 |
| Crystal Violet         | 6.16±0.205         | 372.3       | 340.3         | 356.1* | 15      | 55           | 38 |
| Basic Green 1          | 6.44±0.16          | 385.0       | 297.0         | 341.0* | 10      | 50           | 38 |
| Basic Orange 22        | 6.05±0.145         | 391.0       | 361.0         | 376.0* | 10      | 35           | 28 |
| Basic Blue 11          | 6.34±0.16          | 422.5       | 272.5         | 393.3* | 15      | 43           | 32 |
| Rhodamine 6G           | 6.11±0.185         | 443.0       | 341.0         | 415.0* | 10      | 35           | 48 |
| Rhodamine B            | 6.07±0.105         | 443.0       | 355.0         | 399.0* | 10      | 60           | 45 |
| Ethyl Violet 4         | 6.84±0.14          | 456.4       | 368.1         | 412.1* | 15      | 55           | 45 |
| Basic Blue 7           | 6.74±0.155         | 478.7       | 389.9         | 434.2* | 15      | 55           | 43 |
| Basic Red 14           | 3.44±0.155         | 344.2       | 274.0         | 289.0* | 15      | 35           | 30 |
| Basic Red 13           | 4.95±0.155         | 353.5       | 289.0*        | 338.0  | 15      | 33           | 24 |
| Basic Violet 7         | 6.07±0.15          | 381.0       | 317.0         | 366.0* | 10      | 32           | 25 |
| Basic Blue 26          | 6.45±0.15          | 470.3       | 349.2         | 454.0* | 15      | 37           | 43 |
| Malachite Green        | 5.17±0.195         | 329.0       | 208.0*        | 313.0  | 10      | 35           | 35 |

\* Quantitative ion.

**Table S3.** Calibration curve and limit characteristics of 16 basic dyes.

| Num | Dyes            | Regression equation | Linear range<br>( $\mu\text{g}\cdot\text{L}^{-1}$ ) | LOD<br>( $\mu\text{g}\cdot\text{L}^{-1}$ ) | Correlation coefficient |
|-----|-----------------|---------------------|-----------------------------------------------------|--------------------------------------------|-------------------------|
| 1   | Basic Orange 21 | Y=41039 X-2553      | 5-60                                                | 0.0842                                     | 0.9980                  |
| 2   | Basic Red 46    | Y=17675X+1829       | 5-60                                                | 0.0475                                     | 0.9978                  |
| 3   | Basic Violet 1  | Y=5165X-3856        | 5-60                                                | 0.1236                                     | 0.9995                  |
| 4   | Crystal Violet  | Y=86491X+92025      | 5-60                                                | 0.0324                                     | 0.9975                  |
| 5   | Basic Green 1   | Y=76057 X+16635     | 5-60                                                | 0.0197                                     | 0.9989                  |
| 6   | Basic Orange 22 | Y=55214X-178        | 5-60                                                | 0.0198                                     | 0.9977                  |
| 7   | Basic Blue 11   | Y=13825X+9367       | 5-60                                                | 0.0314                                     | 0.9989                  |
| 8   | Rhodamine 6G    | Y=56373X+24679      | 5-60                                                | 0.0194                                     | 0.9958                  |
| 9   | Rhodamine B     | Y=54159X+39213      | 5-60                                                | 0.0317                                     | 0.9962                  |
| 10  | Ethyl Violet 4  | Y=58032X+41012      | 5-60                                                | 0.0374                                     | 0.9939                  |
| 11  | Basic Blue 7    | Y=40522X+45623      | 5-60                                                | 0.0253                                     | 0.9959                  |
| 12  | Basic Red 14    | Y=18534X-9172       | 5-60                                                | 0.0564                                     | 0.9987                  |
| 13  | Basic Red 13    | Y=2640X-2053        | 5-60                                                | 0.0441                                     | 0.9988                  |
| 14  | Basic Violet 7  | Y=5569X+1958        | 5-60                                                | 0.0151                                     | 0.9952                  |
| 15  | Basic Blue 26   | Y=12828X+4001       | 5-60                                                | 0.0799                                     | 0.9955                  |
| 16  | Malachite Green | Y=10897X-3388       | 5-60                                                | 0.1885                                     | 0.9975                  |

**Table S4.** MSPE Comparison of M-GO, M-RGO and M-S-RGO.

|                 | M-GO         | M-RGO        | M-S-RGO      |
|-----------------|--------------|--------------|--------------|
| Basic Orange 21 | 11.77 (4.64) | 13.62 (4.97) | 96.94 (3.92) |
| Basic Red 46    | 16.52 (4.81) | 15.60 (5.07) | 97.52 (4.84) |
| Basic Violet 1  | 13.70 (5.33) | 18.42 (4.72) | 97.13 (4.79) |
| Crystal Violet  | 12.42 (4.36) | 9.09 (4.43)  | 95.84 (5.20) |
| Basic Green 1   | 17.83 (4.81) | 17.49 (4.13) | 96.49 (4.63) |
| Basic Orange 22 | 16.24 (5.55) | 22.08 (5.63) | 98.20 (4.87) |
| Basic Blue 11   | 18.72 (4.34) | 20.26 (4.90) | 96.85 (5.24) |
| Rhodamine 6G    | 6.18 (4.19)  | 12.79 (4.69) | 97.31 (4.98) |
| Rhodamine B     | 9.92 (4.98)  | 15.24 (5.07) | 97.24 (4.35) |
| Ethyl Violet 4  | 16.87 (5.02) | 26.13 (4.96) | 95.42 (4.61) |
| Basic Blue 7    | 15.07 (3.77) | 22.40 (4.28) | 97.07 (5.38) |
| Basic Red 14    | 18.61 (4.48) | 16.55 (4.75) | 96.62 (4.92) |
| Basic Red 13    | 14.13 (5.07) | 26.17 (4.36) | 97.43 (4.71) |
| Basic Violet 7  | 10.41 (4.62) | 13.38 (5.18) | 96.58 (4.23) |
| Basic Blue 26   | 14.33 (5.37) | 19.65 (4.62) | 97.60 (4.46) |
| Malachite Green | 7.87 (5.44)  | 8.32 (4.83)  | 94.71 (4.89) |

\*All dyes were 1mg/L, M-GO, M-RGO and M-S-RGO were 1mg/mL, n=3.

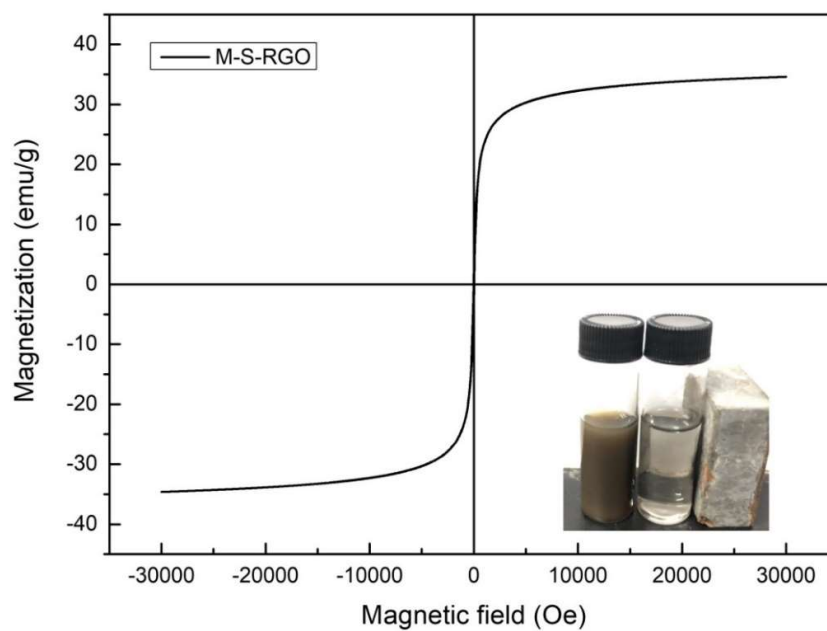

**Figure S1.** The magnetic hysteresis loop of M-S-RGO.

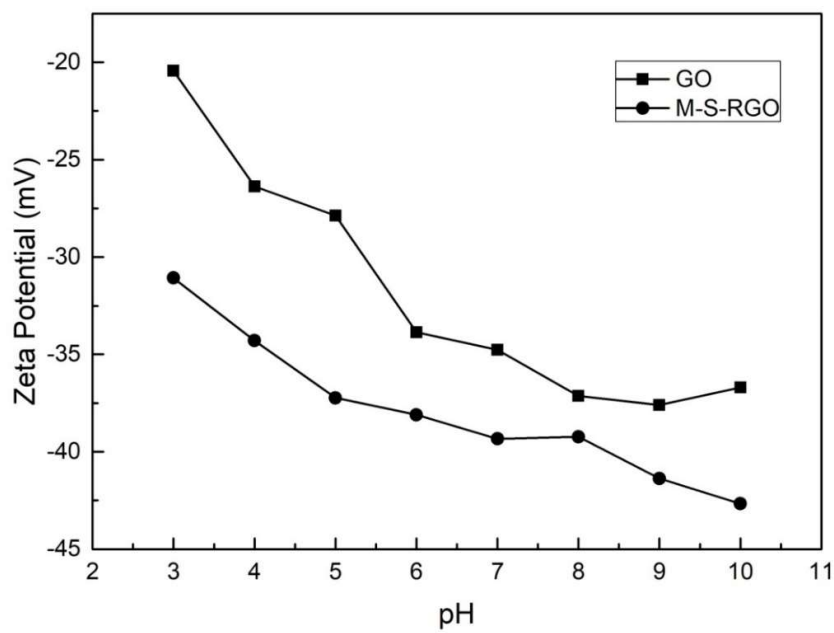

**Figure S2.** The Zeta potential images of GO and M-S-RGO.

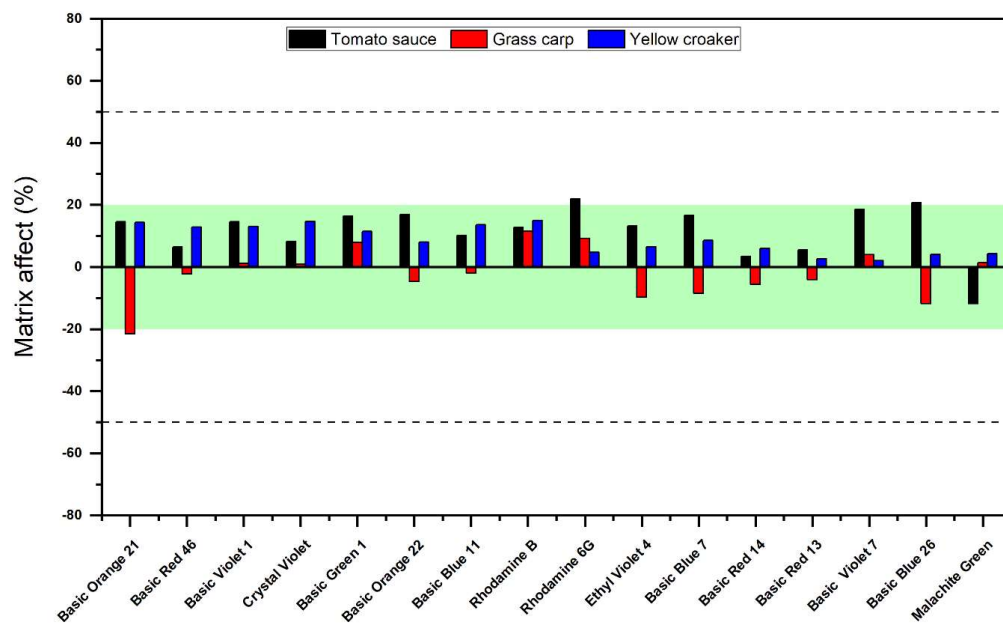

**Figure S3.** The matrix effect of 16 synthetic basic dyes in 3 samples.

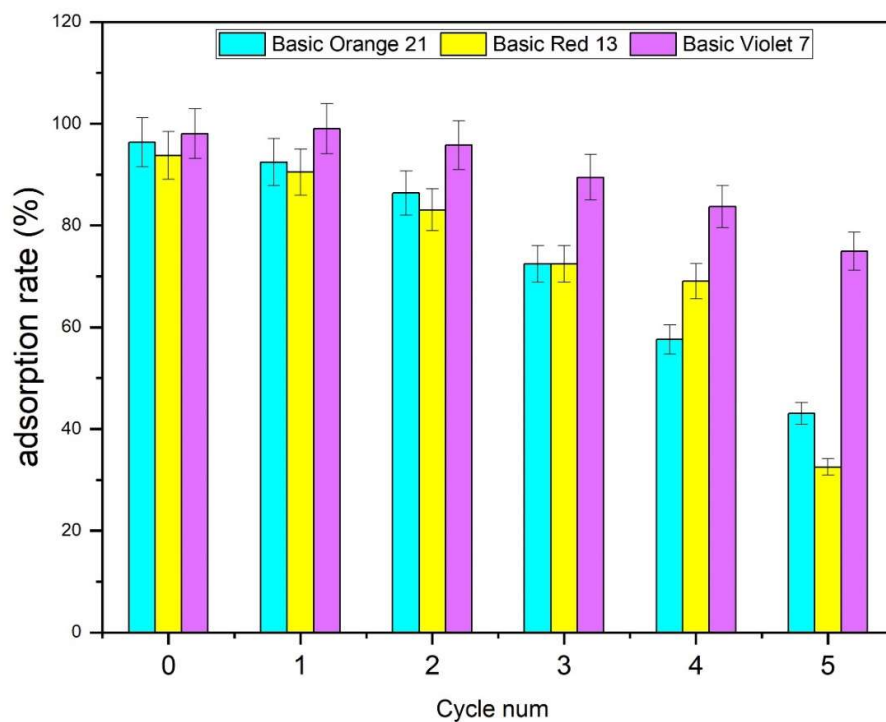

**Figure S4.** Reusability of M-S-RGO in the remove of 3 synthetic basic dyes.

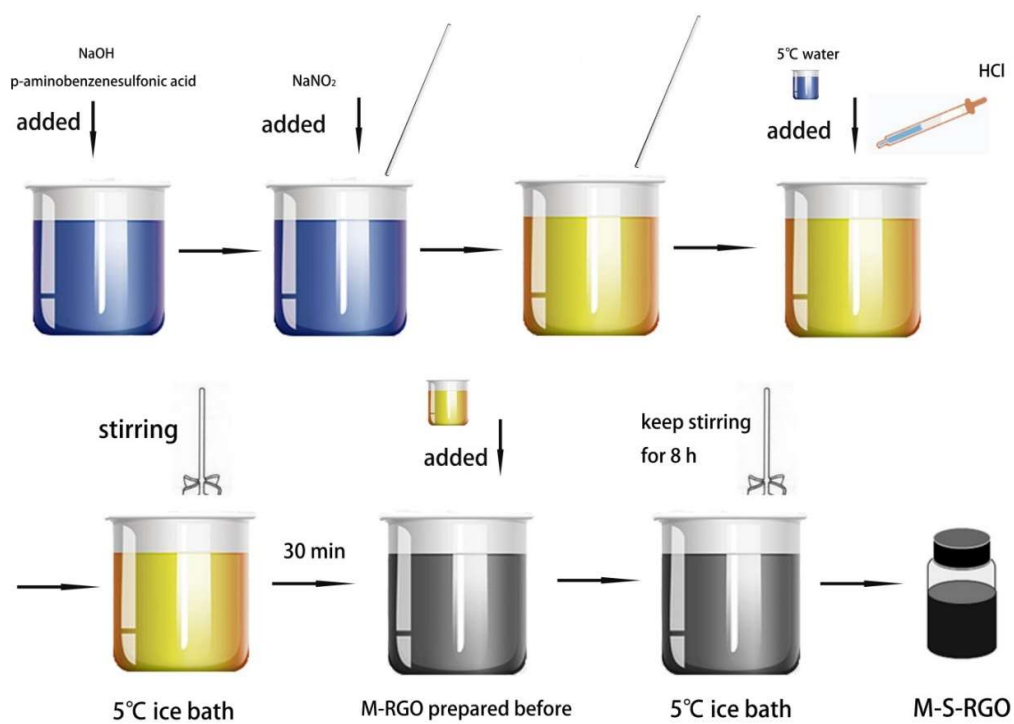

**Figure S5.** Schematic illustration of the M-RGO sulfonation process.

20200730-04 Smooth(Mn,1x2)  
std10

F2:MRM of 24 channels,ES+  
315 > 300  
7.568e+006

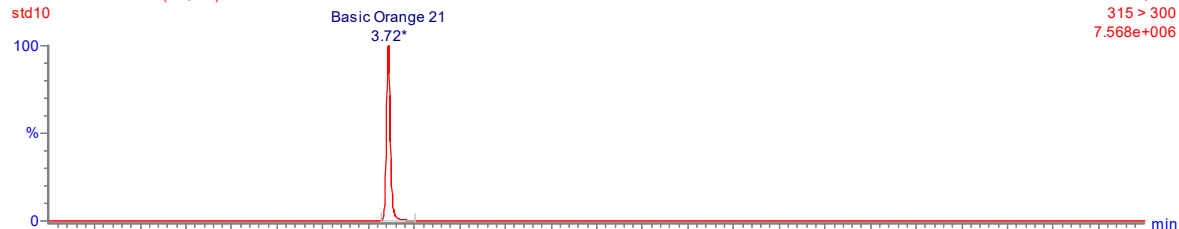

20200730-04 Smooth(Mn,1x2)  
std10

F2:MRM of 24 channels,ES+  
315 > 285  
2.443e+006

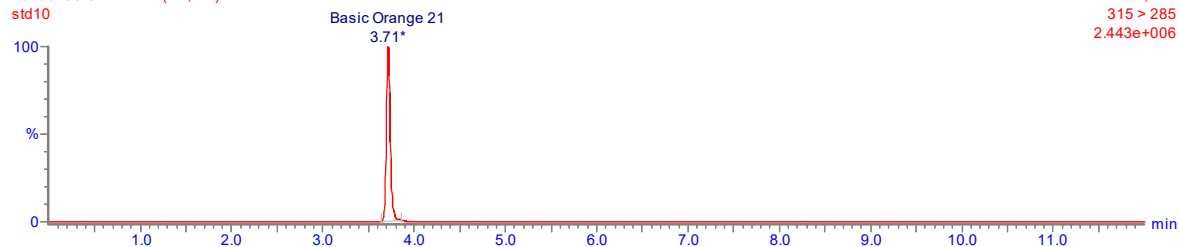

20200730-04 Smooth(Mn,1x2)  
std10

F2:MRM of 24 channels,ES+  
321.4 > 196.25  
2.845e+006

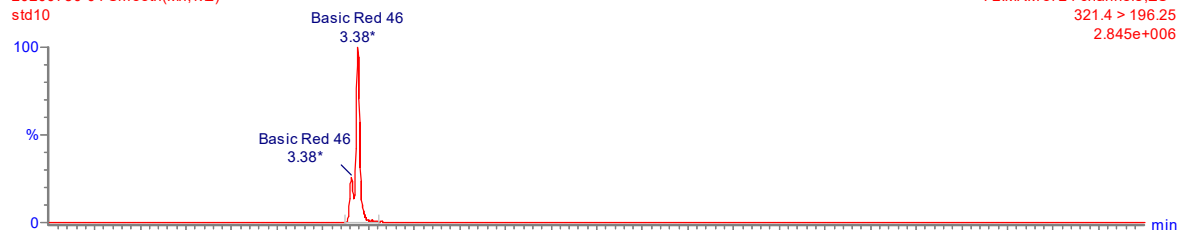

20200730-04 Smooth(Mn,1x2)  
std10

F2:MRM of 24 channels,ES+  
321.4 > 90.97  
2.204e+006

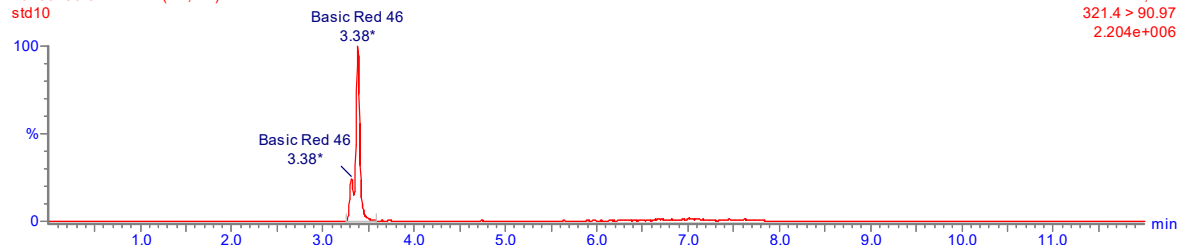

20200730-04 Smooth(Mn,1x2)  
std10

F2.MRM of 24 channels, ES+  
358.8 > 343.25  
1.387e+006

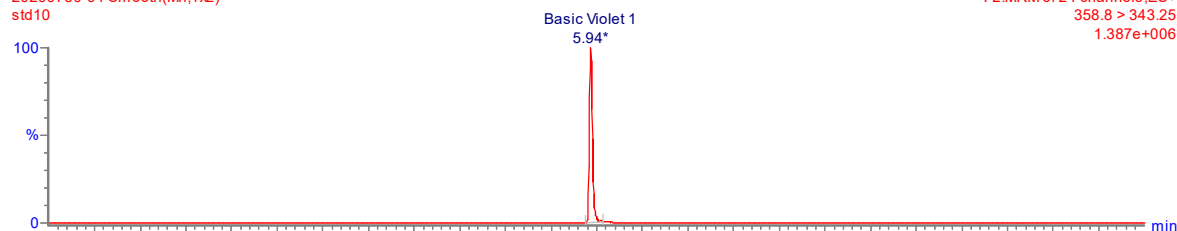

20200730-04 Smooth(Mn,1x2)  
std10

F2.MRM of 24 channels, ES+  
358.8 > 327.37  
3.908e+005

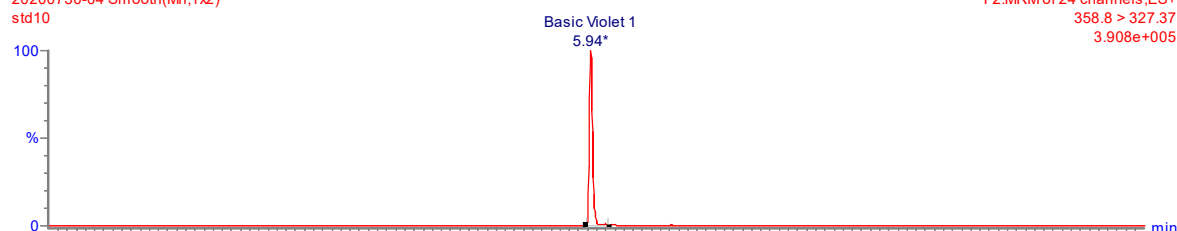

20200730-04 Smooth(Mn,1x2)  
std10

F2.MRM of 24 channels, ES+  
372.3 > 356.12  
2.436e+007

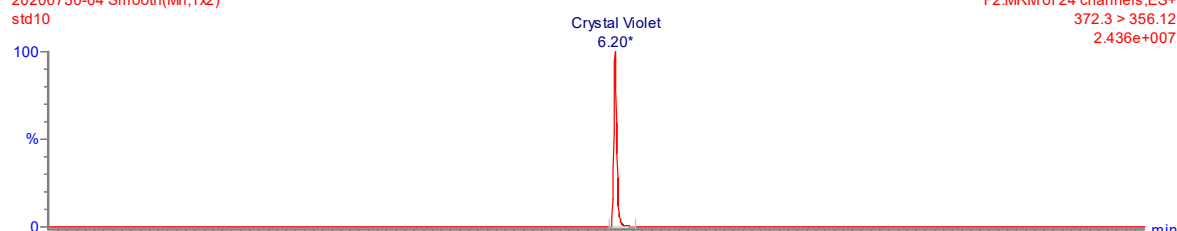

20200730-04 Smooth(Mn,1x2)  
std10

F2.MRM of 24 channels, ES+  
372.3 > 340.03  
1.056e+007

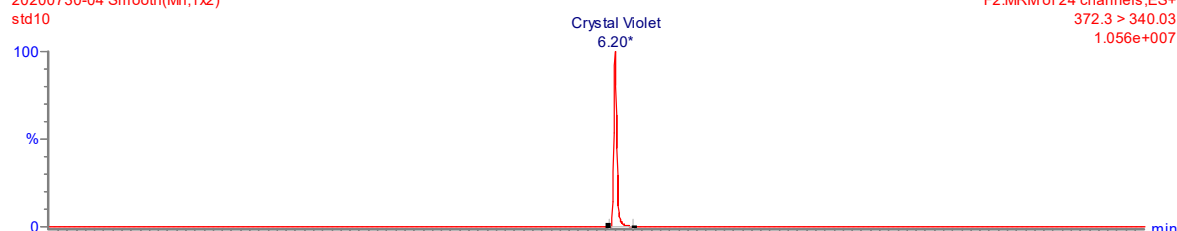

20200730-04 Smooth(Mn,1x2)  
std10

F2.MRM of 24 channels, ES+  
385 > 341  
2.137e+007

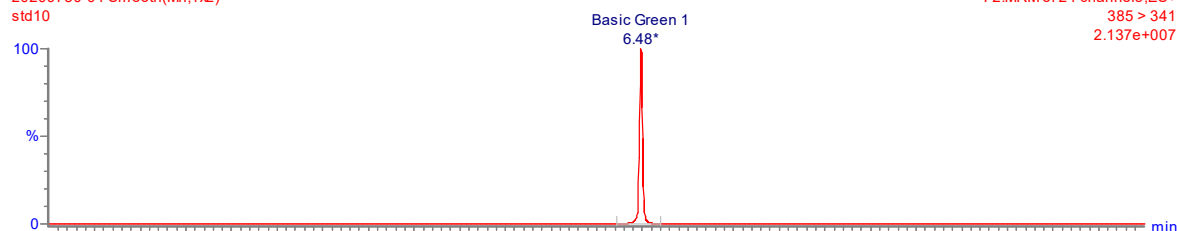

20200730-04 Smooth(Mn,1x2)  
std10

F2.MRM of 24 channels, ES+  
385 > 297  
1.046e+007

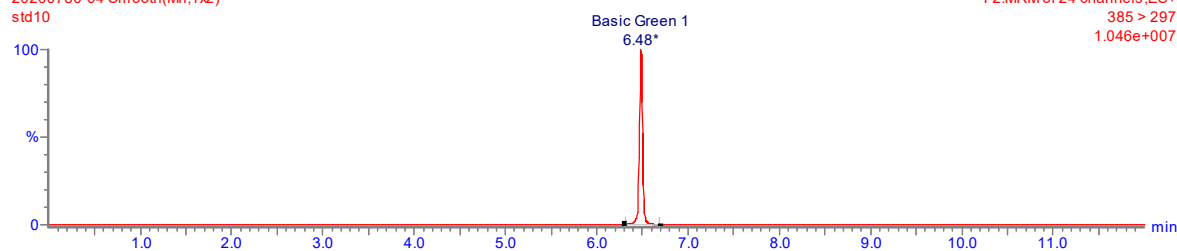



20200730-04 Smooth(Mn,1x2)  
std10

F2.MRM of 24 channels, ES+  
391 > 376  
1.539e+007

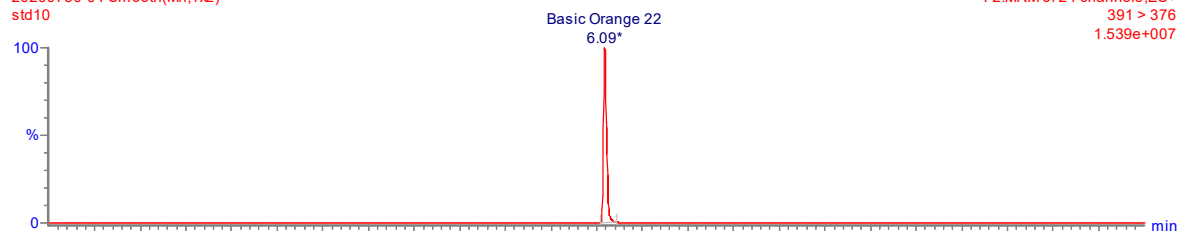

20200730-04 Smooth(Mn,1x2)  
std10

F2.MRM of 24 channels, ES+  
391 > 361  
2.873e+006

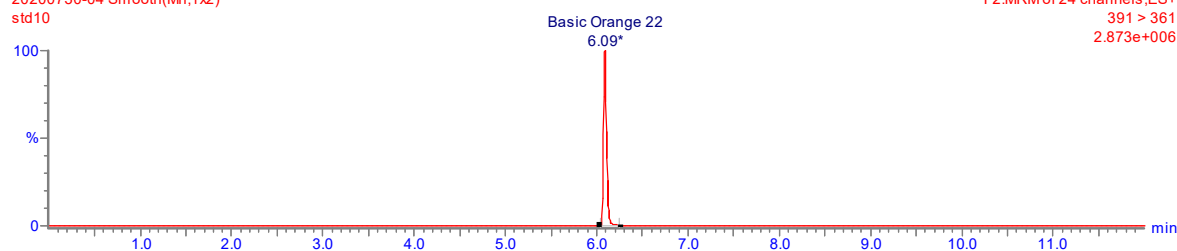

20200730-04 Smooth(Mn,1x2)  
std10

F2.MRM of 24 channels, ES+  
422.55 > 393.32  
3.844e+006

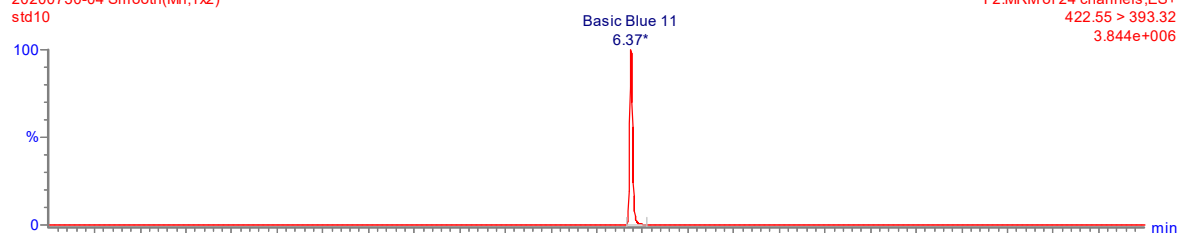

20200730-04 Smooth(Mn,1x2)  
std10

F2.MRM of 24 channels, ES+  
422.55 > 272.54  
2.554e+006

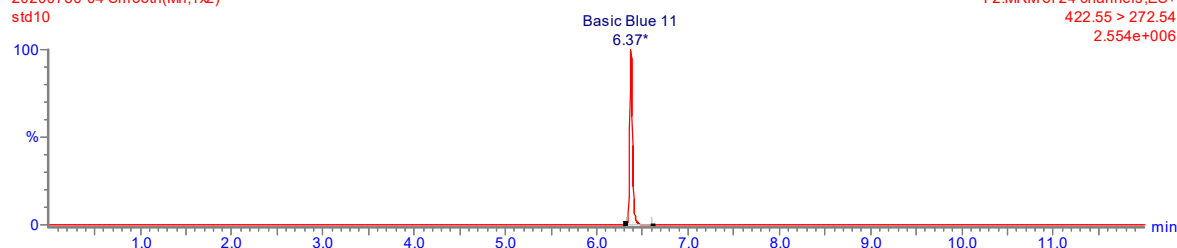

20200730-04 Smooth(Mn,1x2)  
std10

F2.MRM of 24 channels, ES+  
443 > 415  
1.640e+007

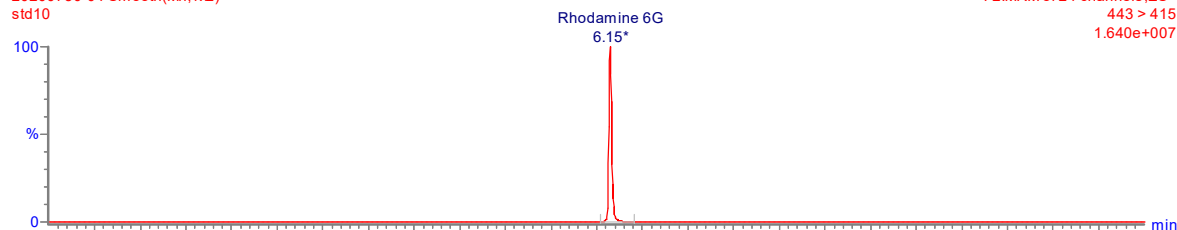

20200730-04 Smooth(Mn,1x2)  
std10

F2.MRM of 24 channels, ES+  
443 > 341  
6.305e+006

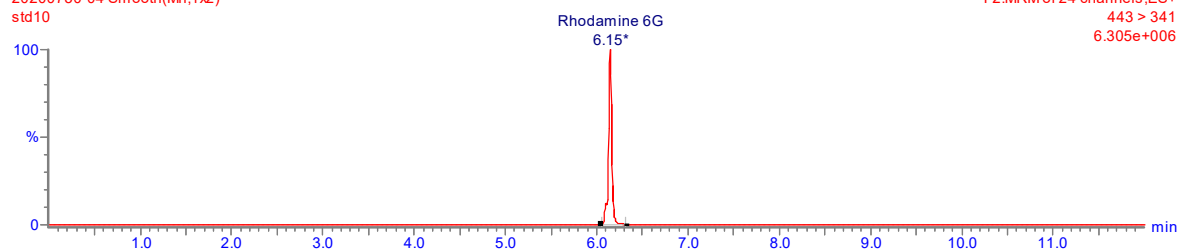

20200730-04 Smooth(Mn,1x2)  
std10

F2.MRM of 24 channels, ES+  
443 > 399  
1.485e+007

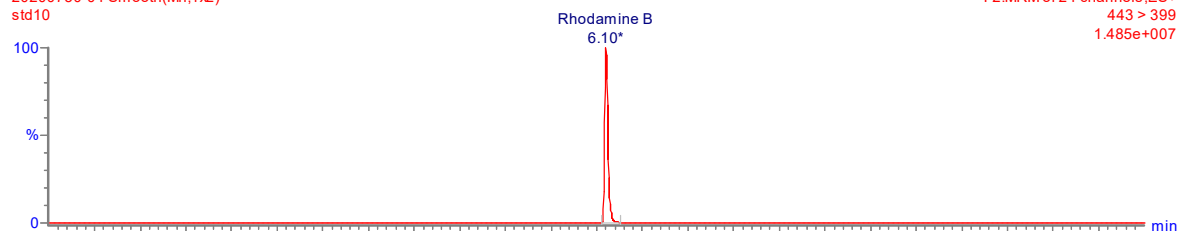

20200730-04 Smooth(Mn,1x2)  
std10

F2.MRM of 24 channels, ES+  
443 > 355  
1.402e+007

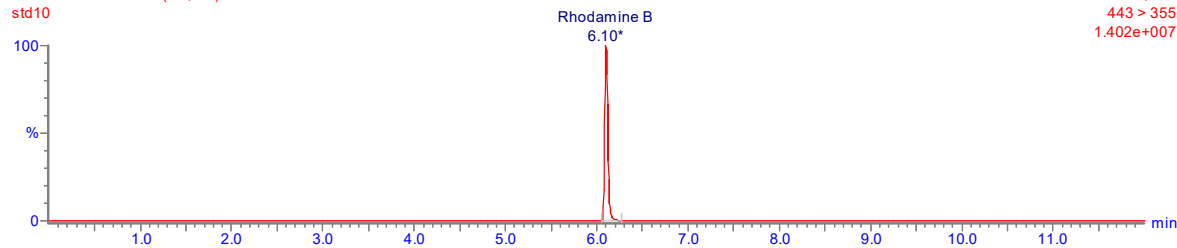

20200730-04 Smooth(Mn,1x2)  
std10

F2.MRM of 24 channels, ES+  
456.35 > 412.12  
1.750e+007

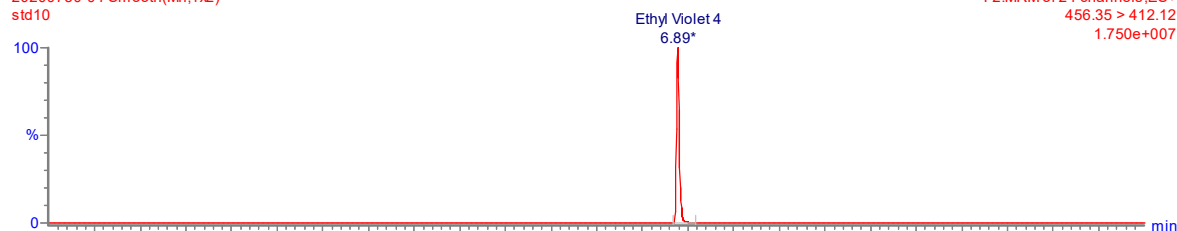

20200730-04 Smooth(Mn,1x2)  
std10

F2.MRM of 24 channels, ES+  
456.35 > 368.12  
1.388e+007

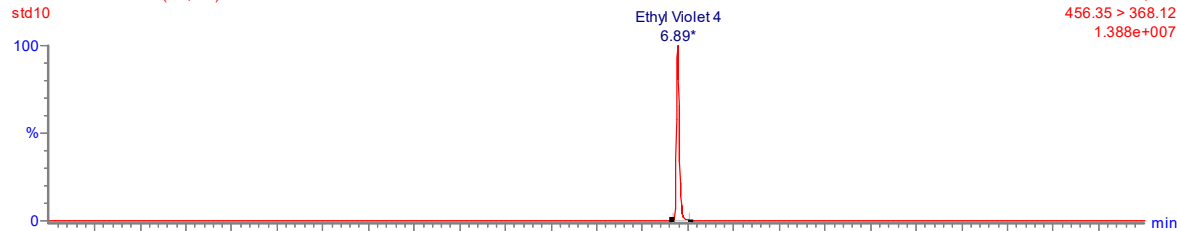

20200730-04 Smooth(Mn,1x2)  
std10

F2.MRM of 24 channels, ES+  
478.68 > 434.17  
1.157e+007

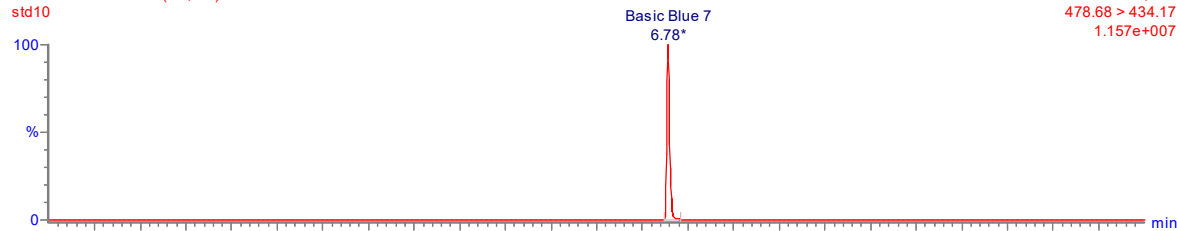

20200730-04 Smooth(Mn,1x2)  
std10

F2.MRM of 24 channels, ES+  
478.68 > 389.9  
6.095e+006

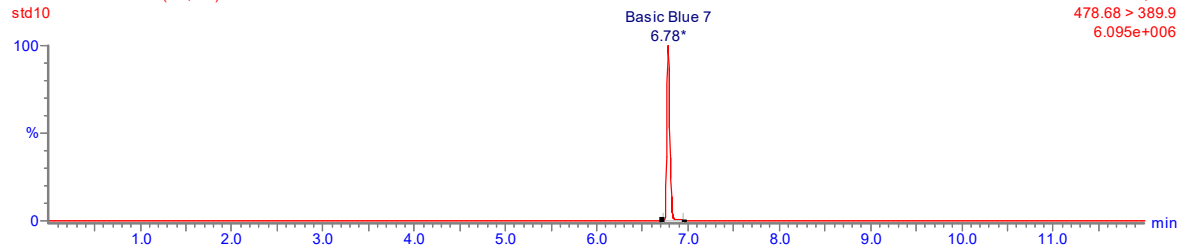

20200730-04 Smooth(Mn,1x2)  
std10

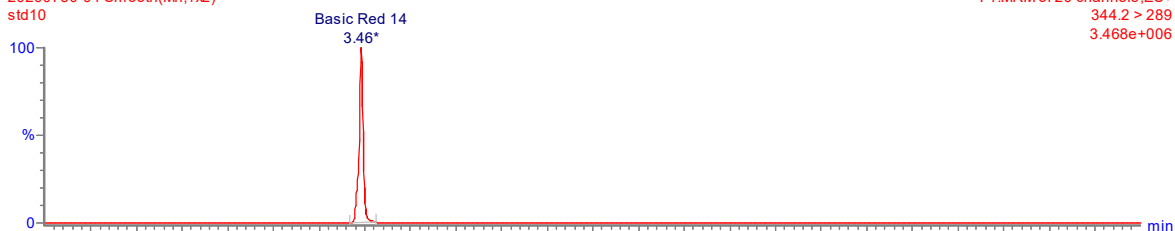

20200730-04 Smooth(Mn,1x2)  
std10

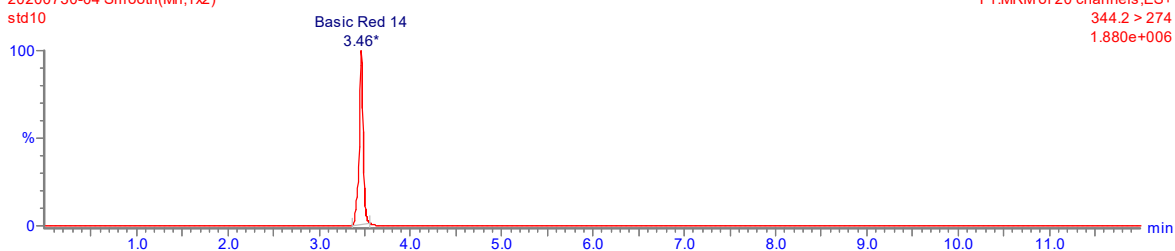

20200730-04 Smooth(Mn,1x2)  
std10

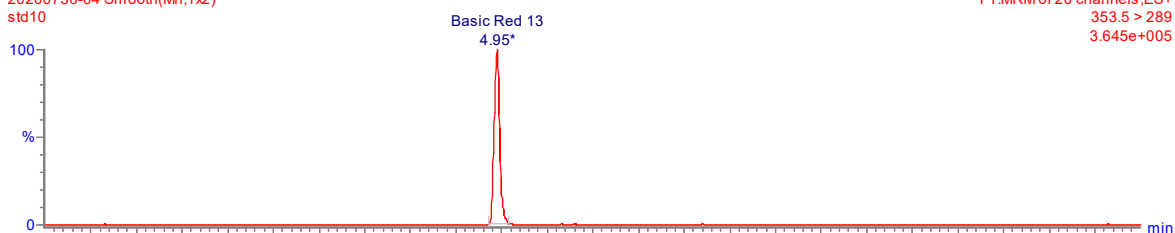

20200730-04 Smooth(Mn,1x2)  
std10

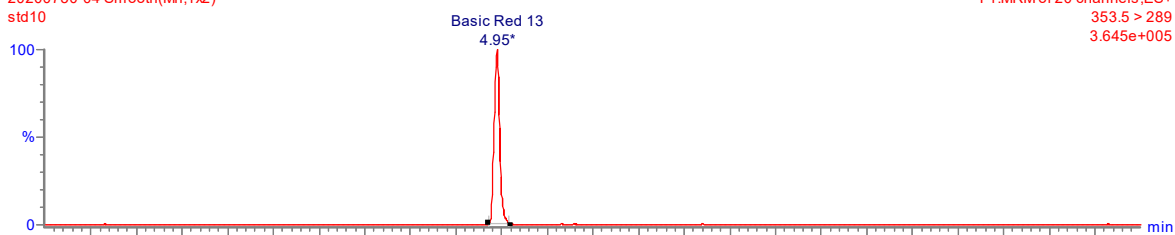

20200730-04 Smooth(Mn,1x2)  
std10

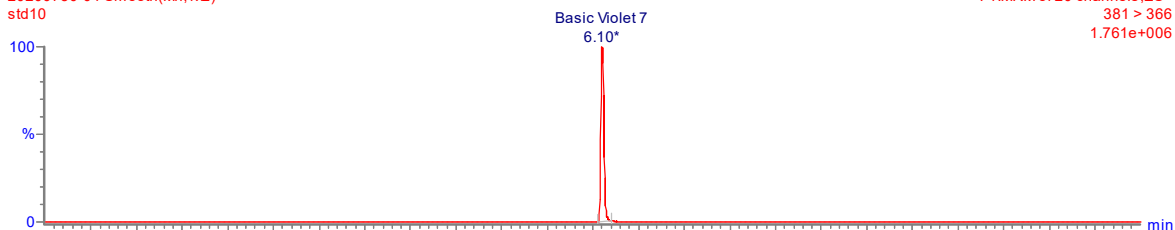

20200730-04 Smooth(Mn,1x2)  
std10

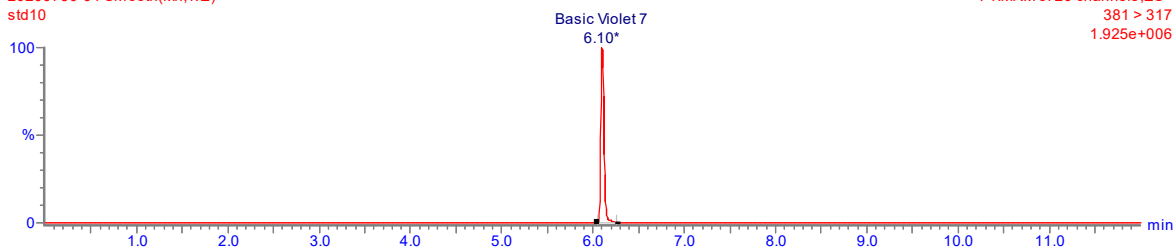

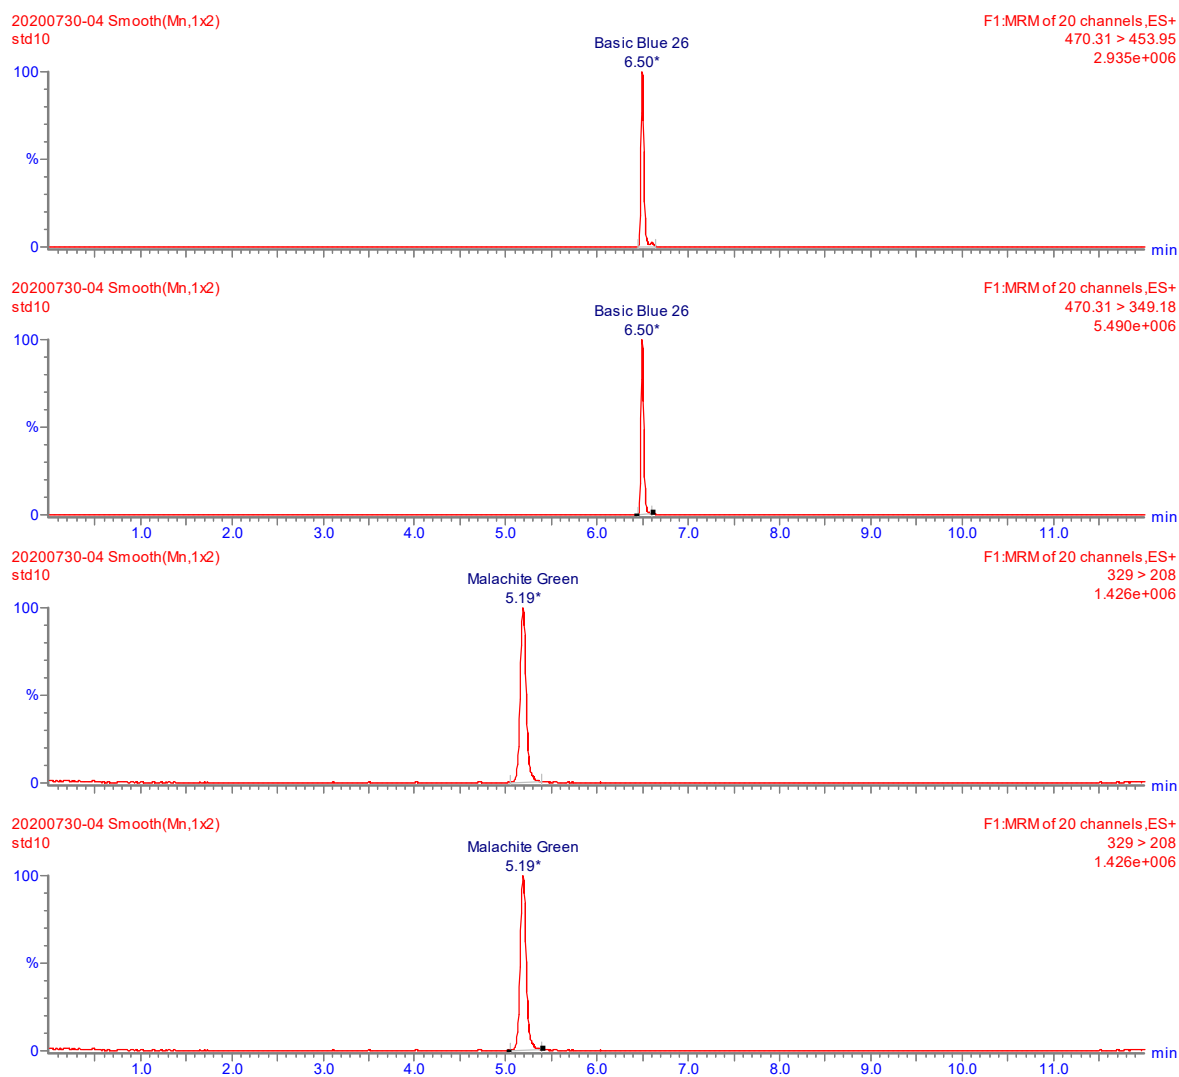

Figure S6. HPLC-MS/MS chromatograms of 16 synthetic basic dyes.
